# Supplementary material
Source: publisher figshare collection journal article supplement (https://gsapubs.figshare.com/ndownloader/files/23305700)
Supplement: Supplementary file 1 [file 23305700]

## DATA REPOSITORY

### Selection of unexplained waterfalls

We detail here how we selected 15 waterfalls out of a total of 62 surveyed waterfalls (Supplementary Table 1, last two columns). To be selected, waterfalls needed to have no explained origin and to be in a setting where equations for fluvial dynamics are valid. The specific reasons they did not meet the criteria are as follows. Eight waterfalls are pinned on lithological contacts and likely to have developed on site. Most of them were due to granite intruding fractured marble in Saline Valley. In Panamint Valley, a total of 14 small waterfalls (between one and five meters) in groups of two to four successive steps are interpreted to be likely due to the development of step-pools. In Panamint Valley as well, four waterfalls coincided with inactive faults where the hanging wall is significantly more fractured than the footwall. In the same valley one waterfall was on the contrary located on an active fault where recent seismic activity caused a co-seismic throw of ~2 m (North Fork of South Middle Park Canyon 2). In Happy Canyon of Panamint Valley, two waterfalls have no obvious origins but lie along a river reach where we observed many waterfalls formed in step-pools and at lithological contacts. We ignore them on the ground that they could be derived from similar causes. In Happy Canyon the local fault has multiple active splay faults that discard the waterfall measured in the canyon because the assumption of accumulated slip on a single fault is violated. The first waterfall of South Badwater 4 lies at the apex of the fan and the base of the waterfall is buried in alluvium so that we could not measure the total height of the bedrock waterfall. In the same catchment, waterfalls 3a and 3b lie next to each other in a section where the channel is split in two. The height of the second waterfall of South Badwater 5 could not be measured because we could not get access to a viewpoint overlooking the entire waterfall. In South Badwater 3 and 4, the fourth waterfall counting from the apex is at least twice as high as the downstream ones: 26 m and >20 m respectively. They are the likely result of several waterfalls that merged during their upstream migration. In Copper Canyon several waterfalls were identified in the tributaries of the main canyon but they were all cut in Quaternary conglomerate recently uplifted after the normal fault migrated basinward. We ignore this catchment as we lack information about the former geometry of the alluvial fan. In the end there remains 25 unexplained waterfalls that could correspond to the shielding mechanism. However, for seven of them, debris flows dominate the alluvial fan and its channel and we cannot apply Equation 13. Finally, there are 18 individual steps that come down to 15 waterfalls after merging small steps in close succession in South Badwater 3 and 4. All the surveyed waterfalls are listed in supplementary Table 1, the selected waterfalls are detailed in Table 2, and three examples showed in Figure 1.

Appendix. Name and symbols of variables used in the main text.

Table DR1. List of the surveyed waterfalls in Saline (SV), Panamint (PV) and Death Valley (DV) with their location and the main characteristics of each site that determine their selection for the demonstration. The precision of the UTM coordinates is oftentimes limited by the high walls of the canyons blocking the acquisition of the GPS signal.

| Symbol        | Variable                                                   |
|---------------|------------------------------------------------------------|
| $A$           | Upstream drained area [ $L^2$ ]                            |
| $D$           | Grain size (using $D_{50}$ measured in the field) [L]      |
| $\Delta S$    | Difference between steep and gentle equilibrium slopes [1] |
| $E$           | Erosion rate in catchment [L/T]                            |
| $f_{coarse}$  | Coarse fraction of total sediment flux [1]                 |
| $f_{skin}$    | Proportion of skin friction in total Shields stress [1]    |
| $f_{radius}$  | Ratio of hydraulic radius and bankfull depth [1]           |
| $g$           | Gravitational acceleration [ $L/T^2$ ]                     |
| $h_{bf}$      | Bankfull depth [L]                                         |
| $h_c$         | Critical water depth to entrain sediment grains [L]        |
| $h_{max}$     | Maximum waterfall height [L]                               |
| $h_{sed}$     | Waterfall height limited by sediment aggradation rate [L]  |
| $h_{up}$      | Waterfall height limited by uplift rate [L]                |
| $k_s$         | Bed roughness ( $2D_{84}$ ) [L]                            |
| $L_{fan}$     | Length of the alluvial fan [L]                             |
| $Q_s$         | Sediment flux [ $L^3/T$ ]                                  |
| $Q_w$         | Water discharge [ $L^3/T$ ]                                |
| $R$           | Submerged density of sediment [1]                          |
| $R_h$         | Hydraulic radius [L]                                       |
| $\rho$        | Density [ $M/L^3$ ]                                        |
| $S$           | Slope [1]                                                  |
| $S_{gentle}$  | Gentle gradient equilibrium slope [1]                      |
| $S_{steep}$   | Steep gradient equilibrium slope [1]                       |
| $t_f$         | Forcing timescale [T]                                      |
| $t_s$         | Sedimentary timescale [T]                                  |
| $t_u$         | Uplift timescale [T]                                       |
| $\tau^*_c(S)$ | Critical Shields stress [1]                                |
| $\tau^*_m$    | Morphological drag component of the Shields stress [1]     |
| $\tau^*_{sf}$ | Skin friction component of the Shields stress [1]          |
| $\tau^*_T$    | Total Shields stress [1]                                   |
| $u$           | Flow velocity [L/T]                                        |
| $u^*$         | Shear velocity ( $(\tau/\rho)^{1/2}$ ) [L/T]               |
| $U$           | Uplift rate [L/T]                                          |
| $V$           | Volume to fill to reach $S_{steep}$ from $S_{gentle}$      |
| $W$           | Channel width [L]                                          |
| $w_r$         | Reconstructed rectangular channel width [L]                |
| $z_{bar}$     | Height of bar above thalweg [L]                            |

| Valley | Catchment                              | Water-fall # | Height, m | UTM Quad | UTM E | UTM N | Channel Type | Fault trace | Waterfall origin | selection |
|--------|----------------------------------------|--------------|-----------|----------|-------|-------|--------------|-------------|------------------|-----------|
| DV     | Gower Gulch                            | WTF 1        | 6.75      | 11S      | 5E+05 | 4E+06 | fluvial      | unique      | shield           | yes       |
| DV     | Badwater Canyon                        | WTF 1        | 9.44      | 11S      | 5E+05 | 4E+06 | fluvial      | unique      | shield           | yes       |
| DV     | South Badwater 3                       | WTF 1        | 12.6      | 11S      | 5E+05 | 4E+06 | fluvial      | unique      | shield           | yes       |
| DV     | South Badwater 3                       | WTF 2        | 2.03      | 11S      | 5E+05 | 4E+06 | fluvial      | unique      | shield           | yes       |
| DV     | South Badwater 3                       | WTF 3        | 4.16      | 11S      | 5E+05 | 4E+06 | fluvial      | unique      | shield           | yes       |
| DV     | South Badwater 3                       | WTF 4        | 25.98     | 11S      | 5E+05 | 4E+06 | fluvial      | unique      | merged?          | no        |
| DV     | South Badwater 4 north                 | WTF 1        | 4.39      | 11S      | 5E+05 | 4E+06 | debris flow  | unique      | shield           | no        |
| DV     | South Badwater 4                       | WTF 1        | 4.74      | 11S      | 5E+05 | 4E+06 | fluvial      | unique      | shield           | no        |
| DV     | South Badwater 4                       | WTF 2a       | 4.56      | 11S      | 5E+05 | 4E+06 | fluvial      | unique      | shield           | yes       |
| DV     | South Badwater 4                       | WTF 2b       | 5.55      | 11S      | 5E+05 | 4E+06 | fluvial      | unique      | shield           | yes       |
| DV     | South Badwater 4                       | WTF 2c       | 5.53      | 11S      | 5E+05 | 4E+06 | fluvial      | unique      | shield           | yes       |
| DV     | South Badwater 4                       | WTF 3a       | 2.97      | 11S      | 5E+05 | 4E+06 | fluvial      | unique      | shield           | no        |
| DV     | South Badwater 4                       | WTF 3b       | 3.34      | 11S      | 5E+05 | 4E+06 | fluvial      | unique      | shield           | no        |
| DV     | South Badwater 4                       | WTF 4        | 10.69     | 11S      | 5E+05 | 4E+06 | fluvial      | unique      | shield           | yes       |
| DV     | South Badwater 4                       | WTF 5        | >20       | 11S      | 5E+05 | 4E+06 | fluvial      | unique      | shield           | no        |
| DV     | South Badwater 5 north                 | WTF 1        | 7.03      | 11S      | 5E+05 | 4E+06 | fluvial      | unique      | shield           | yes       |
| DV     | South Badwater 5 south                 | WTF 1        | 10.01     | 11S      | 5E+05 | 4E+06 | fluvial      | unique      | shield           | yes       |
| DV     | South Badwater 5 south                 | WTF 2        | ?         | 11S      | 5E+05 | 4E+06 | fluvial      | unique      | shield           | no        |
| DV     | South Badwater 5 south                 | WTF 3        | 5.43      | 11S      | 5E+05 | 4E+06 | fluvial      | unique      | shield           | yes       |
| DV     | Coffin Canyon                          | WTF 1        | 18.6      | 11S      | 5E+05 | 4E+06 | fluvial      | unique      | shield           | yes       |
| DV     | Copper Canyon                          | WTF 1        | -         | -        | -     | -     | fluvial      | migrated    | -                | no        |
| PV     | Surprise Canyon                        | WTF 1        | 2.36      | 11S      | 5E+05 | 4E+06 | fluvial      | multiple    | fault            | no        |
| PV     | Surprise Canyon                        | WTF 2        | 3.38      | 11S      | 5E+05 | 4E+06 | fluvial      | multiple    | fault            | no        |
| PV     | Surprise Canyon                        | WTF 3        | ~2.5      | 11S      | 5E+05 | 4E+06 | fluvial      | multiple    | fault            | no        |
| PV     | Happy Canyon main canyon               | WTF 1        | 2.9       | 11S      | 5E+05 | 4E+06 | fluvial      | multiple    | lithology        | no        |
| PV     | Happy Canyon main canyon               | WTF 2        | 6.92      | 11S      | 5E+05 | 4E+06 | fluvial      | multiple    | ?                | no        |
| PV     | Happy Canyon main canyon               | WTF 3        | 4.09      | 11S      | 5E+05 | 4E+06 | fluvial      | multiple    | ?                | no        |
| PV     | Happy Canyon main canyon               | WTF 4        | 1.62      | 11S      | 5E+05 | 4E+06 | fluvial      | multiple    | step-pool        | no        |
| PV     | Happy Canyon main canyon               | WTF 5        | 1.94      | 11S      | 5E+05 | 4E+06 | fluvial      | multiple    | step-pool        | no        |
| PV     | Pleasant Canyon                        | WTF 1        | 8.19      | 11S      | 5E+05 | 4E+06 | fluvial      | multiple    | shield           | yes       |
| PV     | Middle Park Canyon                     | WTF 1        | 2.22      | 11S      | 5E+05 | 4E+06 | fluvial      | multiple    | fault            | no        |
| PV     | Middle Park Canyon                     | WTF 2        | 3.23      | 11S      | 5E+05 | 4E+06 | fluvial      | multiple    | step-pool        | no        |
| PV     | Middle Park Canyon                     | WTF 3        | 3.07      | 11S      | 5E+05 | 4E+06 | fluvial      | multiple    | step-pool        | no        |
| PV     | Middle Park Canyon                     | WTF 4a       | 5.5       | 11S      | 5E+05 | 4E+06 | fluvial      | multiple    | step-pool        | no        |
| PV     | Middle Park Canyon                     | WTF 4b       | 3.02      | 11S      | 5E+05 | 4E+06 | fluvial      | multiple    | step-pool        | no        |
| PV     | Middle Park Canyon                     | WTF 5        | 4.96      | 11S      | 5E+05 | 4E+06 | fluvial      | multiple    | step-pool        | no        |
| PV     | South Middle Park Canyon 2 north fork  | WTF 1        | 2.12      | 11S      | 5E+05 | 4E+06 | fluvial      | multiple    | active fault     | no        |
| PV     | South Middle Park Canyon 2 middle fork | WTF 1        | 2.29      | 11S      | 5E+05 | 4E+06 | fluvial      | multiple    | step-pool        | no        |
| PV     | South Middle Park Canyon 2 middle fork | WTF 2        | 2.3       | 11S      | 5E+05 | 4E+06 | fluvial      | multiple    | step-pool        | no        |
| PV     | South Middle Park Canyon 2 middle fork | WTF 3        | 2.05      | 11S      | 5E+05 | 4E+06 | fluvial      | multiple    | step-pool        | no        |
| PV     | South Middle Park Canyon 2 south fork  | WTF 1        | 1.08      | 11S      | 5E+05 | 4E+06 | fluvial      | multiple    | step-pool        | no        |
| PV     | South Middle Park Canyon 2 south fork  | WTF 2        | 2.03      | 11S      | 5E+05 | 4E+06 | fluvial      | multiple    | step-pool        | no        |
| PV     | South Middle Park Canyon 2 south fork  | WTF 3        | 2.74      | 11S      | 5E+05 | 4E+06 | fluvial      | multiple    | step-pool        | no        |
| PV     | South Middle Park Canyon 2 south fork  | WTF 4        | 3.91      | 11S      | 5E+05 | 4E+06 | fluvial      | multiple    | step-pool        | no        |
| PV     | South Park Canyon                      | WTF 1        | 9.11      | 11S      | 5E+05 | 4E+06 | fluvial      | migrated    | shield           | yes       |
| PV     | South Park Canyon                      | WTF 2        | 4.73      | 11S      | 5E+05 | 4E+06 | fluvial      | migrated    | shield           | yes       |
| PV     | South Park Canyon                      | WTF 3        | 6.28      | 11S      | 5E+05 | 4E+06 | fluvial      | migrated    | shield           | yes       |
| SV     | Pat Keyes                              | WTF 1        | 11.66     | 11S      | 4E+05 | 4E+06 | fluvial      | unique      | shield           | yes       |
| SV     | Pat Keyes                              | WTF 2        | 11.6      | 11S      | 4E+05 | 4E+06 | fluvial      | unique      | shield           | yes       |
| SV     | McEllvoy                               | WTF 1a       | 1         | 11S      | 4E+05 | 4E+06 | debris flow  | unique      | shield           | no        |
| SV     | McEllvoy                               | WTF 1b       | 8.31      | 11S      | 4E+05 | 4E+06 | debris flow  | unique      | shield           | no        |
| SV     | McEllvoy                               | WTF 2        | 2.59      | 11S      | 4E+05 | 4E+06 | debris flow  | unique      | shield           | no        |
| SV     | Beveridge                              | WTF 1        | 12.85     | 11S      | 4E+05 | 4E+06 | debris flow  | unique      | shield           | no        |
| SV     | Beveridge                              | WTF 2a       | 8.4       | 11S      | 4E+05 | 4E+06 | debris flow  | unique      | shield           | no        |
| SV     | Beveridge                              | WTF 2b       | 11.26     | 11S      | 4E+05 | 4E+06 | debris flow  | unique      | shield           | no        |
| SV     | Hunter Canyon                          | WTF 1        | 6.12      | 11S      | 4E+05 | 4E+06 | debris flow  | unique      | lithology        | no        |
| SV     | Hunter Canyon                          | WTF 2        | 10.23     | 11S      | 4E+05 | 4E+06 | debris flow  | unique      | lithology        | no        |
| SV     | Hunter Canyon                          | WTF 3        | ~5        | 11S      | 4E+05 | 4E+06 | debris flow  | unique      | lithology        | no        |
| SV     | Craig Canyon                           | WTF 1a       | 3.14      | 11S      | 4E+05 | 4E+06 | debris flow  | unique      | lithology        | no        |
| SV     | Craig Canyon                           | WTF 1b       | 2.97      | 11S      | 4E+05 | 4E+06 | debris flow  | unique      | lithology        | no        |
| SV     | Craig Canyon                           | WTF 2        | 5.91      | 11S      | 4E+05 | 4E+06 | debris flow  | unique      | lithology        | no        |
| SV     | Craig Canyon                           | WTF 3        | 11.29     | 11S      | 4E+05 | 4E+06 | debris flow  | unique      | lithology        | no        |
